# Supplementary material for: Factors influencing the accumulation of organochlorine pesticides in the surface soil across the Central Tibetan Plateau, China
Source: Royal Society of Chemistry journal article supplement (doi:10.1039/c3em00450c), 2014-01-01
Supplement: c3em00450c1.pdf [file c3em00450c1.pdf]

## Supplementary Information

### Factors influencing accumulation of organochlorine pesticides in the surface soil across Central Tibetan Plateau, China

Guo-Li Yuan<sup>a,b,\*</sup>, Jian-Xun Qin<sup>a</sup>, Xin-Xin Lang<sup>a</sup>, Jun Li<sup>a</sup>, Gen-Hou Wang<sup>a</sup>

<sup>a</sup> School of the Earth Sciences and Resources, China University of Geosciences, Beijing 100083, China.

<sup>b</sup> State Key Laboratory of Biogeology and Environmental Geology, China University of Geosciences, Beijing 100083, China.

\*Corresponding author phone: +86-10-82334657; e-mail: [yuangl@cugb.edu.cn](mailto:yuangl@cugb.edu.cn).

**Table S1. Information of sampling sites**

| Sites | Latitude (°N) | Longitude(°E) | Altitude<br>(m, above sea level) |
|-------|---------------|---------------|----------------------------------|
| GR1   | 32.2985       | 83.9545       | 4413                             |
| GR2   | 32.4027       | 83.0682       | 4451                             |
| GR3   | 32.4970       | 82.4363       | 4432                             |
| GR4   | 32.0571       | 81.8464       | 4641                             |
| GR5   | 32.3991       | 81.0712       | 4522                             |
| GR6   | 32.3599       | 81.3551       | 4511                             |
| GR7   | 31.8607       | 80.1846       | 4594                             |
| GR8   | 31.1949       | 80.7519       | 4622                             |
| GR9   | 31.1329       | 80.7465       | 4387                             |
| GR10  | 30.6581       | 81.3250       | 4606                             |
| GR11  | 30.6581       | 82.4164       | 5158                             |
| GR12  | 29.6539       | 84.1734       | 4590                             |
| GR13  | 29.5924       | 84.9117       | 4607                             |
| GR14  | 29.5496       | 85.5280       | 4627                             |
| GR15  | 29.4393       | 86.6723       | 4599                             |
| GR16  | 28.4792       | 86.1616       | 4657                             |
| GR17  | 28.6018       | 86.7743       | 4334                             |
| GR18  | 28.9538       | 87.4369       | 5247                             |
| GR19  | 29.0482       | 87.8540       | 4070                             |
| GR20  | 29.1515       | 88.6334       | 4023                             |
| GR21  | 28.8451       | 89.8065       | 4193                             |
| GR22  | 29.1941       | 90.6228       | 4759                             |
| GR23  | 32.2937       | 84.0871       | 4444                             |
| GR24  | 31.9552       | 84.8921       | 4685                             |
| GR25  | 31.3359       | 85.0836       | 4708                             |
| GR26  | 30.7203       | 85.1661       | 4754                             |
| GR27  | 30.0945       | 85.5353       | 5352                             |
| GR28  | 29.4170       | 85.8125       | 4937                             |
| GR29  | 29.4418       | 96.6465       | 4601                             |
| GR30  | 29.2164       | 87.4012       | 4317                             |
| GR31  | 29.2154       | 88.2542       | 4007                             |
| GR32  | 33.3191       | 89.0688       | 3855                             |
| GR33  | 33.4900       | 86.9200       | 4824                             |
| GR34  | 32.7900       | 86.9200       | 4743                             |
| GR35  | 32.0900       | 86.5900       | 4618                             |
| GR36  | 31.8000       | 87.2400       | 4567                             |
| GR37  | 31.8700       | 88.1300       | 4732                             |
| GR38  | 31.5800       | 88.8800       | 4606                             |
| GR39  | 31.5700       | 89.6900       | 4630                             |
| GR40  | 31.4300       | 90.0200       | 4743                             |
| GR41  | 31.1633       | 90.7300       | 4718                             |
| GR42  | 30.4300       | 91.0300       | 4239                             |
| GR43  | 29.7800       | 90.7930       | 3835                             |
| GR44  | 29.7000       | 91.1500       | 3711                             |

**Table S2. The content of soil organic carbon (SOC) in samples**

|              |             |             |             |             |             |             |             |             |             |             |             |
|--------------|-------------|-------------|-------------|-------------|-------------|-------------|-------------|-------------|-------------|-------------|-------------|
| <b>Sites</b> | <b>GR1</b>  | <b>GR2</b>  | <b>GR3</b>  | <b>GR4</b>  | <b>GR5</b>  | <b>GR6</b>  | <b>GR7</b>  | <b>GR8</b>  | <b>GR9</b>  | <b>GR10</b> | <b>GR11</b> |
| SOC(%)       | 0.08        | 0.18        | 0.17        | 0.19        | 0.08        | 0.14        | 0.18        | 0.23        | 0.12        | 0.14        | 0.55        |
| <b>Sites</b> | <b>GR12</b> | <b>GR13</b> | <b>GR14</b> | <b>GR15</b> | <b>GR16</b> | <b>GR17</b> | <b>GR18</b> | <b>GR19</b> | <b>GR20</b> | <b>GR21</b> | <b>GR22</b> |
| SOC(%)       | 0.19        | 0.21        | 0.17        | 0.23        | 0.32        | 0.28        | 0.15        | 0.26        | 0.26        | 0.34        | 1.19        |
| <b>Sites</b> | <b>GR23</b> | <b>GR24</b> | <b>GR25</b> | <b>GR26</b> | <b>GR27</b> | <b>GR28</b> | <b>GR29</b> | <b>GR30</b> | <b>GR31</b> | <b>GR32</b> | <b>GR33</b> |
| SOC(%)       | 0.17        | 0.13        | 0.36        | 0.29        | 0.72        | 0.36        | 0.42        | 0.55        | 0.61        | 0.13        | 0.36        |
| <b>Sites</b> | <b>GR34</b> | <b>GR35</b> | <b>GR36</b> | <b>GR37</b> | <b>GR38</b> | <b>GR39</b> | <b>GR40</b> | <b>GR41</b> | <b>GR42</b> | <b>GR43</b> | <b>GR44</b> |
| SOC(%)       | 2.81        | 1.62        | 0.57        | 0.46        | 0.43        | 0.31        | 0.78        | 0.13        | 0.72        | 0.94        | 0.57        |

**Table S3. The content of minerals in soil samples**

| Minerals (%) | Clay minerals* |       |       |       |       | $\Sigma (I/S+I+K+C+C/S)$ | Quartz | Orthoclase | Plagioclase | Calcite | Dolomite | Pyrite | Hornblende |
|--------------|----------------|-------|-------|-------|-------|--------------------------|--------|------------|-------------|---------|----------|--------|------------|
|              | I/S            | I     | K     | C     | C/S   |                          |        |            |             |         |          |        |            |
| GR1          | 13.00          | 58.00 | 14.00 | 15.00 | 0.00  | 18.90                    | 34.10  | 6.60       | 9.70        | 22.10   | 7.60     | 0.00   | 1.00       |
| GR2          | 11.00          | 58.00 | 12.00 | 19.00 | 0.00  | 31.30                    | 34.70  | 14.70      | 14.90       | 3.40    | 0.00     | 0.00   | 1.00       |
| GR3          | 28.00          | 50.00 | 10.00 | 12.00 | 0.00  | 26.00                    | 29.20  | 20.90      | 14.90       | 7.20    | 0.00     | 1.80   | 0.00       |
| GR4          | 50.00          | 35.00 | 7.00  | 8.00  | 0.00  | 18.20                    | 37.90  | 9.70       | 29.70       | 3.30    | 0.00     | 0.00   | 1.20       |
| GR5          | 35.00          | 47.00 | 10.00 | 8.00  | 0.00  | 10.50                    | 41.00  | 15.50      | 20.80       | 9.90    | 0.00     | 0.00   | 2.30       |
| GR6          | 17.00          | 56.00 | 17.00 | 10.00 | 0.00  | 25.00                    | 42.20  | 8.50       | 22.50       | 0.00    | 0.00     | 0.00   | 1.80       |
| GR7          | 24.00          | 53.00 | 11.00 | 12.00 | 0.00  | 23.50                    | 41.60  | 7.90       | 27.00       | 0.00    | 0.00     | 0.00   | 0.00       |
| GR8          | 48.00          | 30.00 | 10.00 | 12.00 | 0.00  | 28.00                    | 38.60  | 8.50       | 22.60       | 0.90    | 0.00     | 0.00   | 1.40       |
| GR9          | 59.00          | 16.00 | 14.00 | 11.00 | 0.00  | 12.00                    | 58.60  | 10.00      | 19.40       | 0.00    | 0.00     | 0.00   | 0.00       |
| GR10         | 60.00          | 26.00 | 7.00  | 7.00  | 0.00  | 30.00                    | 48.30  | 9.30       | 10.50       | 1.90    | 0.00     | 0.00   | 0.00       |
| GR11         | 0.00           | 69.00 | 9.00  | 22.00 | 0.00  | 26.00                    | 30.70  | 4.80       | 14.20       | 21.20   | 3.10     | 0.00   | 0.00       |
| GR12         | 13.00          | 65.00 | 6.00  | 16.00 | 0.00  | 16.60                    | 50.40  | 12.90      | 15.30       | 4.80    | 0.00     | 0.00   | 0.00       |
| GR13         | 0.00           | 72.00 | 10.00 | 18.00 | 0.00  | 7.90                     | 56.50  | 10.30      | 21.40       | 3.90    | 0.00     | 0.00   | 0.00       |
| GR14         | 0.00           | 70.00 | 6.00  | 24.00 | 0.00  | 11.50                    | 63.60  | 8.60       | 16.30       | 0.00    | 0.00     | 0.00   | 0.00       |
| GR15         | 50.00          | 15.00 | 5.00  | 20.00 | 10.00 | 35.00                    | 41.40  | 2.00       | 21.10       | 0.50    | 0.00     | 0.00   | 0.00       |
| GR16         | 77.00          | 11.00 | 6.00  | 6.00  | 0.00  | 28.40                    | 46.90  | 4.70       | 14.10       | 5.90    | 0.00     | 0.00   | 0.00       |
| GR17         | 56.00          | 19.00 | 6.00  | 11.00 | 8.00  | 11.40                    | 53.90  | 4.00       | 12.80       | 14.70   | 0.00     | 0.00   | 3.20       |
| GR18         | 0.00           | 88.00 | 4.00  | 8.00  | 0.00  | 56.40                    | 38.60  | 1.70       | 3.30        | 0.00    | 0.00     | 0.00   | 0.00       |
| GR19         | 14.00          | 61.00 | 4.00  | 6.00  | 15.00 | 35.00                    | 41.60  | 6.60       | 16.80       | 0.00    | 0.00     | 0.00   | 0.00       |
| GR20         | 73.00          | 4.00  | 6.00  | 0.00  | 17.00 | 13.80                    | 57.70  | 10.70      | 17.20       | 0.60    | 0.00     | 0.00   | 0.00       |
| GR21         | 0.00           | 76.00 | 8.00  | 16.00 | 0.00  | 12.60                    | 50.90  | 15.90      | 18.00       | 2.60    | 0.00     | 0.00   | 0.00       |

**Table S3. (continued)**

| Minerals<br>(%) | Clay minerals* |       |       |       |       | $\Sigma$ (I/S+I+K+<br>C+C/S) | Quartz | Orthoclase | Plagioclase | Calcite | Dolomite | Pyrite | Hornblende |
|-----------------|----------------|-------|-------|-------|-------|------------------------------|--------|------------|-------------|---------|----------|--------|------------|
|                 | I/S            | I     | K     | C     | C/S   |                              |        |            |             |         |          |        |            |
| GR22            | 0.00           | 72.00 | 12.00 | 16.00 | 0.00  | 44.70                        | 45.10  | 1.10       | 9.10        | 0.00    | 0.00     | 0.00   | 0.00       |
| GR23            | 12.00          | 68.00 | 10.00 | 10.00 | 0.00  | 9.30                         | 52.70  | 10.00      | 19.60       | 8.40    | 0.00     | 0.00   | 0.00       |
| GR26            | 27.00          | 50.00 | 12.00 | 11.00 | 0.00  | 7.60                         | 51.80  | 15.10      | 18.90       | 6.60    | 0.00     | 0.00   | 0.00       |
| GR27            | 0.00           | 74.00 | 13.00 | 13.00 | 0.00  | 22.00                        | 44.40  | 2.40       | 7.70        | 14.70   | 7.00     | 0.00   | 1.80       |
| GR28            | 20.00          | 67.00 | 8.00  | 5.00  | 0.00  | 24.00                        | 58.10  | 5.40       | 12.50       | 0.00    | 0.00     | 0.00   | 0.00       |
| GR29            | 0.00           | 70.00 | 15.00 | 15.00 | 0.00  | 29.50                        | 42.20  | 5.90       | 22.40       | 0.00    | 0.00     | 0.00   | 0.00       |
| GR30            | 0.00           | 68.00 | 11.00 | 21.00 | 0.00  | 34.00                        | 53.70  | 0.80       | 11.50       | 0.00    | 0.00     | 0.00   | 0.00       |
| GR31            | 51.00          | 19.00 | 6.00  | 13.00 | 11.00 | 32.00                        | 48.30  | 4.90       | 14.80       | 0.00    | 0.00     | 0.00   | 0.00       |
| GR32            | 0.00           | 55.00 | 7.00  | 28.00 | 10.00 | 36.30                        | 41.70  | 6.00       | 16.00       | 0.00    | 0.00     | 0.00   | 0.00       |
| GR33            | 10.00          | 51.00 | 9.00  | 20.00 | 10.00 | 13.60                        | 61.20  | 3.60       | 19.80       | 1.80    | 0.00     | 0.00   | 0.00       |
| GR34            | 39.00          | 12.00 | 6.00  | 8.00  | 35.00 | 16.60                        | 55.60  | 3.00       | 23.10       | 0.60    | 0.00     | 0.00   | 1.10       |
| GR35            | 17.00          | 66.00 | 9.00  | 8.00  | 0.00  | 9.30                         | 59.50  | 5.60       | 7.80        | 14.00   | 2.30     | 0.00   | 1.50       |
| GR36            | 10.00          | 60.00 | 16.00 | 14.00 | 0.00  | 11.10                        | 46.60  | 5.00       | 6.60        | 28.20   | 2.50     | 0.00   | 0.00       |
| GR37            | 6.00           | 63.00 | 20.00 | 11.00 | 0.00  | 14.70                        | 59.30  | 8.10       | 9.80        | 8.10    | 0.00     | 0.00   | 0.00       |
| GR38            | 7.00           | 66.00 | 14.00 | 13.00 | 0.00  | 10.80                        | 52.00  | 3.70       | 12.70       | 20.80   | 0.00     | 0.00   | 0.00       |
| GR39            | 0.00           | 71.00 | 14.00 | 15.00 | 0.00  | 33.40                        | 46.70  | 4.40       | 9.80        | 5.70    | 0.00     | 0.00   | 0.00       |
| GR40            | 11.00          | 62.00 | 15.00 | 12.00 | 0.00  | 9.30                         | 50.60  | 6.30       | 11.30       | 22.50   | 0.00     | 0.00   | 0.00       |
| GR41            | 5.00           | 69.00 | 14.00 | 12.00 | 0.00  | 18.90                        | 62.20  | 6.00       | 12.00       | 0.00    | 0.00     | 0.00   | 0.90       |
| GR42            | 4.00           | 73.00 | 12.00 | 11.00 | 0.00  | 15.10                        | 51.60  | 20.30      | 13.00       | 0.00    | 0.00     | 0.00   | 0.00       |
| GR43            | 6.00           | 71.00 | 11.00 | 12.00 | 0.00  | 15.50                        | 60.80  | 6.70       | 14.50       | 0.00    | 0.00     | 0.00   | 2.50       |
| GR44            | 0.00           | 82.00 | 8.00  | 10.00 | 0.00  | 21.80                        | 52.30  | 16.50      | 9.40        | 0.00    | 0.00     | 0.00   | 0.00       |

\* I, Illite; S, Smectite; K, Kaolinite; C, Chlorite.

**Table S4. The particles distribution of soil samples**

| $\mu\text{m}$ | <0.5 | <1   | <2   | <3   | <4   | <5    | <6    | <7    | <8    | <9    | <10   | <15   | <20   | 20-20 | 200-900 | >900  |
|---------------|------|------|------|------|------|-------|-------|-------|-------|-------|-------|-------|-------|-------|---------|-------|
| GR1           | 0.12 | 0.43 | 1.17 | 1.81 | 2.32 | 2.73  | 3.08  | 3.38  | 3.64  | 3.87  | 4.07  | 4.80  | 5.22  | 9.06  | 12.51   | 73.17 |
| GR2           | 0.05 | 0.95 | 2.90 | 3.49 | 4.54 | 5.39  | 6.08  | 6.67  | 7.17  | 7.61  | 8.00  | 9.48  | 10.47 | 34.78 | 11.79   | 43.90 |
| GR3           | 0.01 | 0.42 | 1.32 | 2.18 | 2.94 | 3.58  | 4.13  | 4.60  | 5.00  | 5.35  | 5.66  | 6.78  | 7.50  | 22.38 | 29.76   | 40.09 |
| GR4           | 0.04 | 0.71 | 1.06 | 3.23 | 4.16 | 4.91  | 5.52  | 6.03  | 6.46  | 6.83  | 7.15  | 8.29  | 9.01  | 22.94 | 21.72   | 46.33 |
| GR5           | 0.00 | 0.29 | 0.98 | 1.53 | 1.96 | 2.30  | 2.57  | 2.80  | 2.99  | 3.16  | 3.32  | 3.88  | 4.27  | 28.63 | 37.60   | 28.77 |
| GR6           | 0.11 | 0.82 | 4.43 | 4.89 | 5.57 | 6.86  | 7.97  | 8.92  | 9.74  | 10.45 | 11.07 | 13.25 | 14.60 | 29.95 | 22.45   | 47.00 |
| GR7           | 0.13 | 0.60 | 2.79 | 2.98 | 4.06 | 5.01  | 5.84  | 6.58  | 7.23  | 7.80  | 8.31  | 10.19 | 11.40 | 26.86 | 21.15   | 40.00 |
| GR8           | 0.24 | 0.80 | 2.28 | 3.63 | 4.80 | 5.81  | 6.68  | 7.44  | 8.11  | 8.71  | 9.25  | 11.33 | 12.83 | 35.51 | 17.09   | 34.45 |
| GR9           | 0.06 | 0.95 | 2.78 | 4.38 | 5.64 | 6.65  | 7.46  | 8.14  | 8.71  | 9.20  | 9.63  | 11.17 | 12.19 | 22.20 | 30.66   | 33.33 |
| GR10          | 0.05 | 0.95 | 2.85 | 4.56 | 5.93 | 7.02  | 7.90  | 8.63  | 9.24  | 9.76  | 10.21 | 11.83 | 12.85 | 34.07 | 21.57   | 31.36 |
| GR11          | 0.03 | 0.57 | 4.61 | 4.77 | 4.87 | 4.98  | 5.46  | 6.26  | 6.99  | 7.68  | 8.31  | 10.88 | 12.74 | 26.43 | 20.98   | 39.81 |
| GR12          | 0.19 | 0.68 | 1.87 | 2.89 | 3.70 | 4.34  | 4.86  | 5.29  | 5.66  | 5.97  | 6.25  | 7.25  | 7.95  | 10.05 | 13.36   | 68.37 |
| GR13          | 0.00 | 0.09 | 0.50 | 0.83 | 1.13 | 1.40  | 1.64  | 1.86  | 2.04  | 2.19  | 2.32  | 2.79  | 3.23  | 28.29 | 38.83   | 24.64 |
| GR14          | 0.00 | 0.12 | 0.51 | 0.86 | 1.16 | 1.40  | 1.61  | 1.77  | 1.91  | 2.03  | 2.13  | 2.49  | 2.78  | 19.47 | 26.74   | 50.00 |
| GR15          | 0.45 | 0.92 | 4.28 | 4.60 | 4.87 | 5.61  | 6.59  | 6.68  | 7.09  | 7.45  | 7.77  | 9.06  | 10.05 | 30.65 | 24.34   | 34.62 |
| GR16          | 0.12 | 0.75 | 2.86 | 2.98 | 3.79 | 4.45  | 4.99  | 5.44  | 5.84  | 6.18  | 6.48  | 7.60  | 8.36  | 20.62 | 16.42   | 53.10 |
| GR17          | 0.03 | 0.70 | 1.81 | 2.67 | 3.35 | 3.90  | 4.37  | 4.77  | 5.13  | 5.44  | 5.73  | 6.83  | 7.58  | 23.22 | 37.62   | 31.13 |
| GR18          | 0.15 | 1.68 | 5.22 | 5.52 | 6.30 | 8.62  | 9.80  | 9.96  | 10.42 | 10.68 | 11.68 | 11.87 | 13.34 | 35.88 | 9.84    | 39.90 |
| GR19          | 0.14 | 2.52 | 4.55 | 4.74 | 4.97 | 5.05  | 5.83  | 7.13  | 7.56  | 7.94  | 8.28  | 8.58  | 8.92  | 32.34 | 10.08   | 49.55 |
| GR20          | 0.47 | 1.82 | 1.90 | 5.96 | 6.67 | 10.03 | 11.15 | 12.11 | 12.95 | 13.70 | 14.38 | 17.16 | 19.53 | 28.73 | 6.93    | 44.80 |
| GR21          | 0.05 | 0.61 | 1.71 | 2.72 | 3.57 | 4.29  | 4.90  | 5.42  | 5.87  | 6.28  | 6.64  | 8.03  | 9.05  | 24.91 | 14.51   | 49.15 |
| GR22          | 0.54 | 2.53 | 4.02 | 7.58 | 9.01 | 11.25 | 13.30 | 15.16 | 16.85 | 18.40 | 19.82 | 25.51 | 29.76 | 27.11 | 2.13    | 41.00 |
| GR23          | 0.03 | 0.77 | 2.23 | 3.60 | 4.75 | 5.70  | 6.49  | 7.15  | 7.72  | 8.20  | 8.63  | 10.21 | 15.37 | 36.53 | 25.20   | 21.90 |
| GR24          | 0.00 | 0.09 | 0.48 | 0.78 | 1.01 | 1.20  | 1.35  | 1.47  | 1.56  | 1.63  | 1.68  | 1.88  | 8.12  | 26.55 | 35.82   | 27.51 |
| GR25          | 0.05 | 0.26 | 0.84 | 1.38 | 1.87 | 2.29  | 2.66  | 2.98  | 3.26  | 3.51  | 3.73  | 4.57  | 5.16  | 18.28 | 20.14   | 56.43 |
| GR26          | 0.01 | 0.51 | 1.57 | 2.49 | 3.22 | 3.80  | 4.26  | 4.63  | 4.93  | 5.19  | 5.40  | 6.16  | 6.67  | 22.31 | 27.87   | 42.67 |

**Table S4. (continued)**

| $\mu\text{m}$ | <0.5 | <1   | <2   | <3   | <4    | <5    | <6    | <7    | <8    | <9    | <10   | <15   | <20   | 20-20 | 200-900 | >900  |
|---------------|------|------|------|------|-------|-------|-------|-------|-------|-------|-------|-------|-------|-------|---------|-------|
| GR27          | 0.33 | 0.51 | 2.99 | 3.67 | 3.86  | 4.16  | 4.87  | 5.50  | 6.07  | 6.58  | 7.04  | 8.88  | 10.25 | 34.81 | 12.37   | 42.55 |
| GR28          | 0.24 | 1.60 | 3.75 | 3.87 | 4.45  | 4.60  | 5.26  | 5.81  | 6.29  | 6.70  | 7.06  | 8.41  | 9.35  | 14.16 | 3.34    | 73.15 |
| GR29          | 0.05 | 0.39 | 3.60 | 3.71 | 4.20  | 4.59  | 5.11  | 5.19  | 5.43  | 5.64  | 5.83  | 6.56  | 7.11  | 16.00 | 7.23    | 69.66 |
| GR30          | 0.12 | 1.18 | 3.55 | 4.94 | 5.29  | 9.59  | 9.85  | 10.07 | 10.26 | 10.43 | 10.58 | 10.64 | 10.54 | 14.61 | 3.07    | 73.04 |
| GR31          | 0.16 | 0.46 | 1.25 | 2.00 | 2.63  | 3.18  | 3.65  | 4.06  | 4.42  | 4.74  | 5.03  | 6.15  | 6.97  | 6.74  | 12.25   | 74.02 |
| GR32          | 0.11 | 0.43 | 1.23 | 1.88 | 2.38  | 2.77  | 3.11  | 3.39  | 3.65  | 3.89  | 4.10  | 4.98  | 5.69  | 30.30 | 22.72   | 40.29 |
| GR33          | 0.18 | 0.76 | 2.00 | 3.15 | 4.15  | 5.04  | 5.85  | 6.59  | 7.28  | 7.93  | 8.53  | 10.96 | 12.67 | 26.18 | 18.68   | 47.02 |
| GR34          | 0.27 | 1.28 | 3.32 | 4.97 | 6.21  | 7.15  | 7.88  | 8.49  | 9.00  | 9.45  | 9.85  | 11.44 | 12.59 | 29.92 | 16.39   | 39.14 |
| GR35          | 0.13 | 0.66 | 1.79 | 2.70 | 3.36  | 3.84  | 4.20  | 4.48  | 4.70  | 4.89  | 5.06  | 5.69  | 6.15  | 20.53 | 1.74    | 59.92 |
| GR36          | 0.06 | 0.54 | 1.52 | 2.33 | 2.95  | 3.41  | 3.77  | 4.06  | 4.30  | 4.50  | 4.68  | 5.43  | 5.99  | 35.86 | 18.60   | 39.55 |
| GR37          | 0.50 | 2.10 | 3.56 | 8.82 | 11.34 | 13.32 | 14.89 | 16.17 | 17.23 | 18.12 | 18.90 | 21.63 | 23.35 | 24.66 | 0.27    | 47.46 |
| GR38          | 0.12 | 0.73 | 1.87 | 2.71 | 3.30  | 3.73  | 4.07  | 4.33  | 4.55  | 4.75  | 4.92  | 5.59  | 6.06  | 27.68 | 28.70   | 37.55 |
| GR39          | 0.26 | 1.24 | 3.14 | 4.60 | 5.67  | 6.49  | 7.14  | 7.68  | 8.14  | 8.55  | 8.92  | 10.35 | 11.37 | 24.98 | 3.91    | 59.75 |
| GR40          | 0.23 | 1.10 | 2.82 | 4.11 | 5.01  | 5.68  | 6.21  | 6.64  | 7.01  | 7.34  | 7.64  | 8.84  | 9.72  | 18.34 | 17.92   | 59.67 |
| GR41          | 0.07 | 0.62 | 1.70 | 2.53 | 3.16  | 3.64  | 4.03  | 4.34  | 4.60  | 4.83  | 5.02  | 5.76  | 6.31  | 44.26 | 5.25    | 37.58 |
| GR42          | 0.50 | 2.22 | 5.50 | 8.12 | 10.19 | 11.91 | 13.38 | 14.67 | 15.84 | 16.89 | 17.85 | 21.70 | 24.73 | 55.54 | 5.06    | 26.10 |
| GR43          | 0.49 | 1.97 | 5.05 | 7.94 | 10.50 | 12.73 | 14.69 | 16.42 | 17.95 | 19.34 | 20.59 | 25.65 | 29.63 | 36.08 | 1.44    | 43.61 |
| GR44          | 0.23 | 1.04 | 2.49 | 3.58 | 4.45  | 5.18  | 5.82  | 6.42  | 6.97  | 7.48  | 7.96  | 9.96  | 11.54 | 43.23 | 5.44    | 35.88 |

**Table S5. Mean, Median and range of OCPs in soil samples**

| Compound                 | Values(ng/kg) |         |        |        | Detection Rate (%) |
|--------------------------|---------------|---------|--------|--------|--------------------|
|                          | Min           | Max     | median | mean   |                    |
| $\alpha$ -HCH            | N.D           | 270.0   | 90.0   | 90.0   | 79.30              |
| $\beta$ -HCH             | N.D           | 6600.0  | 360.0  | 1160.0 | 22.70              |
| $\gamma$ -HCH            | N.D           | 613.0   | 1290.0 | 1710.0 | 43.20              |
| $\delta$ -HCH            | N.D           | 130.0   | 50.0   | 60.0   | 86.40              |
| HCB                      | N.D           | 150.0   | 60.0   | 60.0   | 97.70              |
| Heptachlor               | N.D           | 90.0    | 30.0   | 30.0   | 20.50              |
| Aldrin                   | N.D           | 200.0   | 110.0  | 110.0  | 4.50               |
| Oxychlordane             | N.D           | 30.0    | 30.0   | 30.0   | 4.50               |
| cis-Heptachlor Epoxide   | N.D           | 30.0    | 20.0   | 20.0   | 11.40              |
| trans-Heptachlor Epoxide | N.D           | 3400.0  | 200.0  | 970.0  | 9.10               |
| 2,4'-DDE                 | N.D           | 1280.0  | 90.0   | 160.0  | 38.60              |
| 4,4'-DDE                 | N.D           | 1500.0  | 120.0  | 210.0  | 52.30              |
| trans-Chlordane          | N.D           | 30.0    | 30.0   | 30.0   | 2.30               |
| cis-Chlordane            | N.D           | 50.0    | 10.0   | 30.0   | 15.90              |
| trans-Nonachlor          | N.D           | 60.0    | 40.0   | 30.0   | 15.90              |
| cis-Nonachlor            | N.D           | N.D     | N.D    | N.D    | N.D                |
| Dieldrin                 | N.D           | 4300.0  | 540.0  | 1080.0 | 13.60              |
| 2,4'-DDD                 | N.D           | 1170.0  | 60.0   | 20.0   | 34.10              |
| 4,4'-DDD                 | N.D           | 240.0   | 110.0  | 110.0  | 79.50              |
| 2,4'-DDT                 | N.D           | 120.0   | 50.0   | 50.0   | 72.70              |
| 4,4'-DDT                 | N.D           | 32000.0 | 70.0   | 2220.0 | 38.60              |
| Endrin                   | N.D           | 2110.0  | 1520.0 | 1520.0 | 4.50               |
| Mirex                    | N.D           | 150.0   | 80.0   | 80.0   | 6.80               |

N.D.: not detected, lower than the limit of detection.



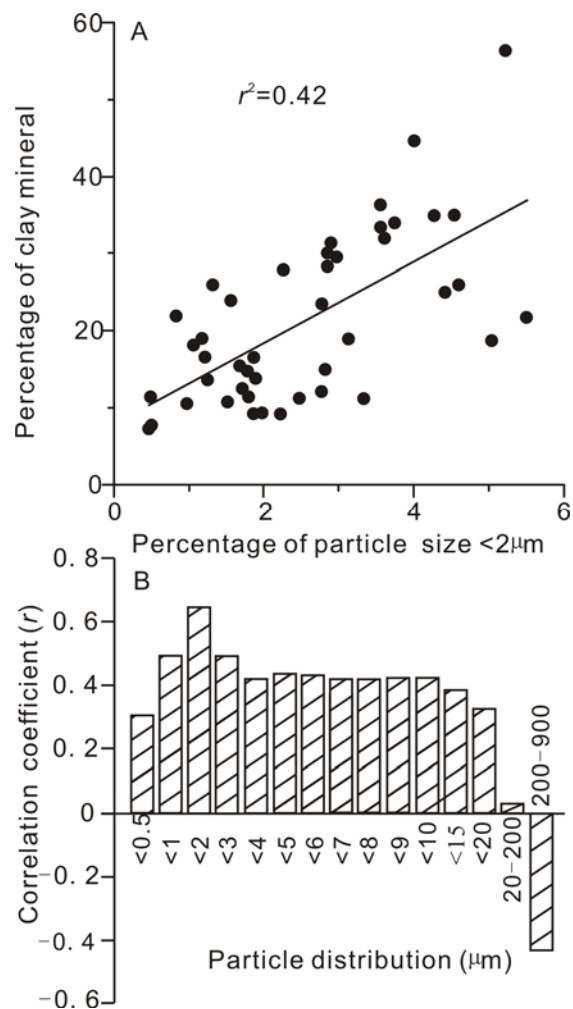

**Fig. S1** The relationship between clay and particle size <2 mm (A), and the correlation coefficients with other grain-size fractions (B)

**Table S6.** The coefficients of the Fitting Equations for individual OCPs according to Mode Eq.(4)

| Mode Eq.(4) |   | Coefficient |            | Sig(P) |
|-------------|---|-------------|------------|--------|
|             |   | B           | Std. Error |        |
| α-HCH       | c | -1.994      | 1.909      | .305   |
|             | m | 1.033       | .442       | .027   |
|             | a | .523        | .274       | .066   |
| δ-HCH       | c | -1.324      | .869       | .139   |
|             | m | .913        | .213       | .000   |
|             | a | .383        | .150       | .016   |
| HCB         | c | -.914       | 1.063      | .396   |
|             | m | .891        | .239       | .001   |
|             | a | .311        | .163       | .065   |
| 2, 4'-DDT   | c | -.832       | 1.115      | .463   |
|             | m | .791        | .261       | .006   |
|             | a | .366        | .162       | .033   |
| 4,4'-DDD    | c | .028        | 1.243      | .982   |
|             | m | .744        | .281       | .013   |
|             | a | .429        | .196       | .038   |

**Table S7. The coefficients of the Fitting Equation for individual OCPs according to Mode Eq.(3)**

| Mode Eq.(3) |   | Coefficients |            | Sig( <i>P</i> ) |
|-------------|---|--------------|------------|-----------------|
|             |   | B            | Std. Error |                 |
| α-HCH       | c | -1.258       | 1.970      | .528            |
|             | m | 1.287        | .432       | .006            |
|             | b | .246         | .174       | .168            |
| δ-HCH       | c | -1.079       | .942       | .262            |
|             | m | 1.163        | .208       | .000            |
|             | b | .155         | .115       | .189            |
| HCB         | c | -.541        | 1.097      | .625            |
|             | m | 1.020        | .246       | .000            |
|             | b | .035         | .108       | .750            |
| 2, 4'-DDT   | c | 0.069        | 1.201      | .954            |
|             | m | .899         | .255       | .002            |
|             | b | .253         | .127       | .059            |
| 4,4'-DDD    | c | .326         | 1.315      | .806            |
|             | m | .769         | .295       | .003            |
|             | b | .110         | .120       | .369            |

**Table S8. Detected concentration of individual OCPs at five sites and corresponding calculated values from model equations in Table 3**

|      | α-HCH |       | δ-HCH |       | HCB   |       | 2,4'-DDT |      | 4,4'-DDD |       |
|------|-------|-------|-------|-------|-------|-------|----------|------|----------|-------|
|      | Det   | Cal   | Det   | Cal   | Det   | Cal   | Det      | Cal  | Det      | Cal   |
| GR23 | 50.0  | 43.0  | 30.0  | 36.0  | 40.0  | 43.0  | 30.0     | 31.0 | 60.0     | 69.0  |
| GR24 | 40.0  | 50.0  | 40.0  | 42.0  | 40.0  | 50.0  | 30.0     | 35.0 | 80.0     | 76.0  |
| GR25 | 70.0  | 89.0  | 60.0  | 64.0  | 60.0  | 69.0  | 40.0     | 51.0 | 160.0    | 122.0 |
| GR26 | 120.0 | 97.0  | 60.0  | 69.0  | 80.0  | 74.0  | 50.0     | 54.0 | 160.0    | 131.0 |
| GR27 | 170.0 | 201.0 | 100.0 | 129.0 | 150.0 | 133.0 | 110.0    | 94.0 | 180.0    | 223.0 |

Det: Detected values in ng/kg

Cal: calculated values in ng/kg

**Table S9. Detected concentration of individual OCPs at five sites and corresponding calculated values of model equation in Table 4**

|      | $\alpha$ -HCH |      | $\delta$ -HCH |       | HCB   |       | 2,4'-DDT |       | 4,4'-DDD |       |
|------|---------------|------|---------------|-------|-------|-------|----------|-------|----------|-------|
|      | Det           | Cal  | Det           | Cal   | Det   | Cal   | Det      | Cal   | Det      | Cal   |
| GR23 | 50.0          | 56.0 | 30.0          | 49.0  | 40.0  | 51.0  | 30.0     | 37.0  | 60.0     | 85.0  |
| GR24 | 40.0          | 72.0 | 40.0          | 62.0  | 40.0  | 65.0  | 30.0     | 43.0  | 80.0     | 104.0 |
| GR25 | 70.0          | 95.0 | 60.0          | 72.0  | 60.0  | 68.0  | 40.0     | 57.0  | 160.0    | 119.0 |
| GR26 | 120.0         | 95.0 | 60.0          | 74.0  | 80.0  | 71.0  | 50.0     | 56.0  | 160.0    | 121.0 |
| GR27 | 170.0         | 257. | 100.0         | 165.0 | 150.0 | 134.0 | 110.0    | 121.0 | 180.0    | 239.0 |

Det: Detected values in ng/kg

Cal: calculated values in ng/kg
